# Supplementary material for: Morphology Controlled Synthesis of Composition Related Plasmonic CuCdS Alloy Nanocrystals
Source: Front Chem. 2020 Dec 23;8:628536. doi: 10.3389/fchem.2020.628536 (PMC7785700; doi:10.3389/fchem.2020.628536)
Supplement: Supplementary file 1 [file Data_Sheet_1.docx]

Supplementary Material

**Morphology Controlled Synthesis of Composition Related Plasmonic CuCdS Alloy Nanocrystals**

Yan Gao,a Lei Wang,*a Guimin Tian,b Shuaipu Zang,b Hongzhe Wang,a Jinzhong Niu,*b Lin Song Lia

aKey Lab for Special Functional Materials, Ministry of Education, National and Local Joint Engineering Research Center for High-Efficiency Display and Lighting Technology, School of Materials Science and Engineering, and Collaborative Innovation Center of Nano Functional Materials and Applications, Henan University, Kaifeng, 475004, China.

bCollege of Materials Engineering, Henan University of Engineering, Zhengzhou, 451191, China.

***Correspondence:**

Dr. Lei Wang; Jinzhong Niu

E-mail: wanglei7869@henu.edu.cn

E-mail: niujinzhong@gmail.com


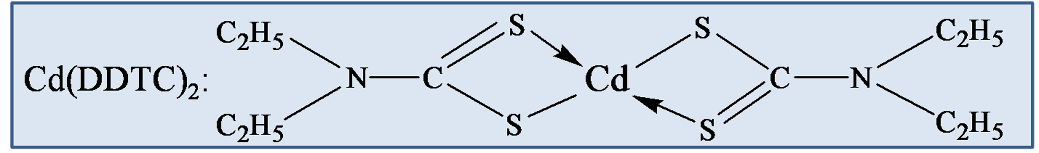


**Figure S1** The chemical structure of Cd(DDTC)2.


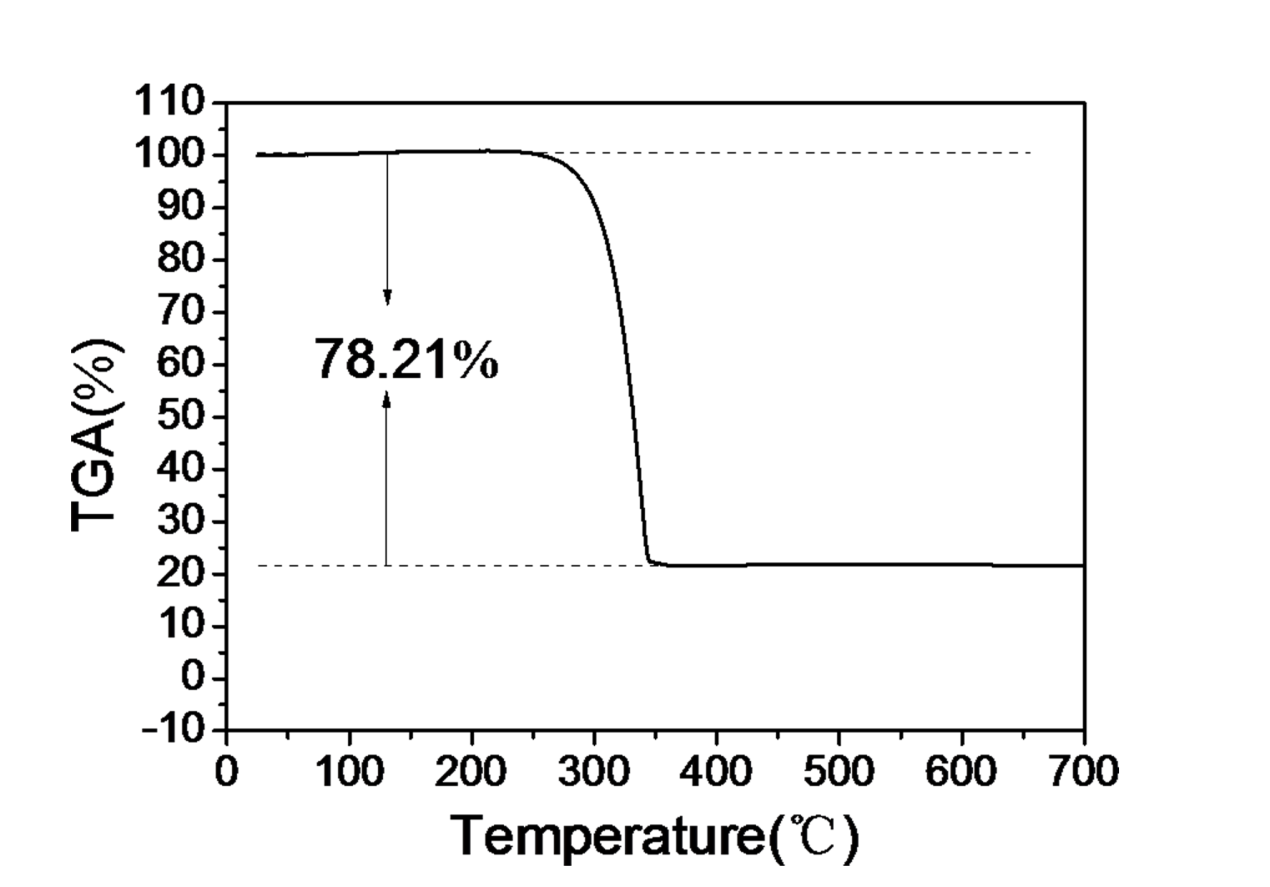


**Figure S2** The TGA result of Cd(DDTC)2.
